1 **CRISPR Turbo Accelerated Knock Out (CRISPy TAKO) for rapid *in vivo* screening of gene**  
2 **function**

3 Plasil SL<sup>1</sup>, Seth A<sup>2</sup>, Homanics GE<sup>1,2,3,\*</sup>

4 <sup>1</sup> Department of Pharmacology and Chemical Biology, University of Pittsburgh School of Medicine,  
5 Pittsburgh, PA 15261, United States

6 <sup>2</sup> Department of Anesthesiology and Perioperative Medicine, University of Pittsburgh School of  
7 Medicine, Pittsburgh, PA 15261, United States

8 <sup>3</sup> Department of Neurobiology, University of Pittsburgh School of Medicine, Pittsburgh, PA 15261,  
9 United States

10 \*Correspondence

11 Gregg E. Homanics, PhD

12 University of Pittsburgh

13 6060 Biomedical Science Tower-3

14 3501 Fifth Avenue

15 Pittsburgh, PA 15261 USA

16 Phone: 412-648-8172

17 Email: [homanicsge@upmc.edu](mailto:homanicsge@upmc.edu)

18 **Keywords: CRISPR/Cas9, genome editing, ethanol, increased mutagenesis, accelerated**  
19 **phenotypic screening, functional knockout**

20 **Abstract:**

21 The development of CRISPR/Cas9 technology has vastly sped up the process of genome editing  
22 by introducing a bacterial system that can be exploited for reverse genetics-based research.  
23 However, generating homozygous knockout (KO) animals using traditional CRISPR/Cas9-  
24 mediated techniques requires three generations of animals. A founder animal with a desired  
25 mutation is crossed to produce heterozygous F1 offspring which are subsequently interbred to  
26 generate homozygous F2 KO animals. This study describes a novel adaptation of the  
27 CRISPR/Cas9-mediated method to develop a homozygous gene-targeted KO animal cohort in  
28 one generation. A well-characterized ethanol-responsive gene, *MyD88*, was chosen as a  
29 candidate gene for generation of *MyD88*<sup>-/-</sup> mice as proof of concept. Previous studies have  
30 reported changes in ethanol-related behavioral outcomes in *MyD88* KO mice. Therefore, it was  
31 hypothesized that a successful one-generation KO of *MyD88* should reproduce decreased  
32 responses to ethanol's sedative effects, as well as increased ethanol consumption in males that  
33 were observed in previous studies. One-cell mouse embryos were simultaneously electroporated  
34 with four gRNAs targeting a critical Exon of *MyD88* along with Cas9. DNA and RNA analysis of  
35 founder mice revealed a complex mix of genetic alterations, all of which were predicted to ablate  
36 *MyD88* gene function. This study additionally compared responses of Mock treatment control  
37 mice generated through electroporation to controls purchased from a vendor. No substantial  
38 behavioral changes were noted between control cohorts. Overall, the CRISPR/Cas9 KO protocol  
39 reported here, which we call **CRISPR Turbo Accelerated KnockOut (CRISPy TAKO)**, will be useful  
40 for reverse genetic *in vivo* screens of gene function in whole animals.

41 **Introduction:**

42           Clustered regulatory interspaced short palindromic repeats (CRISPR) paired with CRISPR  
43 associated protein 9 (Cas9) is currently the dominant and preferred gene editing tool in scientific  
44 research. CRISPR based screens of gene function *ex vivo* have been tremendously useful for  
45 identifying genes involved in tumor suppression<sup>1</sup>, mitochondrial function<sup>2</sup>, and dendritic  
46 developments<sup>3</sup>. High throughput CRISPR loss-of-function reverse genetic screens allow for the  
47 rapid identification of genes involved in phenotypes of interest. However, *in vitro* screens are  
48 limited by phenotypes that can be readily assayed in cell culture, e.g., cellular proliferation, drug  
49 sensitivity, and cell survival. Further, the acquisition of transcriptome data has greatly outpaced  
50 our capacity to functionally study genes of interest. For many biological questions, particularly  
51 those that pertain to dysfunction of the central nervous system where behavioral abnormalities  
52 are the primary phenotype of interest, *in vivo* tests of behavior must be employed. Because  
53 behavior is the phenotype of interest, *in vitro* screens are unsatisfactory. In this study, we sought  
54 to develop a method with moderately high throughput that could be used *in vivo* to screen genes  
55 for effects on behavior.

56           Global gene knockout (KO) animal models are a gold standard approach that have been  
57 widely used to study and delineate the effects of individual molecules in whole organisms. The  
58 recent application and widespread adoption of CRISPR/Cas9 technology dramatically facilitated  
59 KO animal generation. However, the standard method of creating CRISPR KO animals, a.k.a.,  
60 CRISPy Critters<sup>4</sup>, typically requires three generations to produce experimental animals that can  
61 be phenotypically evaluated and therefore is unsuitable for moderate-high throughput *in vivo*  
62 screens (Fig. 1A). Briefly, in a typical CRISPR KO animal study, CRISPR reagents are introduced  
63 to one-cell embryos that develop into founder (F0) animals that are screened for the desired  
64 mutation. F0 animals are typically an eclectic mix of wild-type and mutant animals. The mutants  
65 may be heterozygotes, homozygotes, or compound heterozygotes, and most mutant alleles differ  
66 in the individual mutations they harbor in the target gene of interest. A founder animal that harbors

67 a desirable mutation (typically a frameshift or a large deletion) is then mated to wild-type (WT)  
68 mice to produce heterozygous F1 offspring. Subsequently, heterozygotes are interbred to  
69 produce homozygous F2 mutant KO offspring. These F2 mutant animals have both alleles of the  
70 gene of interest inactivated, they all harbor the same mutation in the gene of interest, and they  
71 can be compared to WT littermate controls for relevant phenotypic changes. Although this  
72 CRISPR approach to creating gene KO animals represents a dramatic savings in time, effort, and  
73 expense compared to traditional embryonic stem cell based gene targeting approaches, the  
74 CRISPR approach still requires considerable time and expense because three generations of  
75 animal production is time consuming and results in substantial animal care and housing  
76 expenses. This process also requires a considerable amount of personnel time for colony  
77 maintenance and genotyping.

78 We endeavored to establish a one generation CRISPR KO approach in which F0 animals  
79 could be directly used to test for the behavioral consequences of gene inactivation. We reasoned  
80 that a very high efficiency CRISPR mutagenesis approach could be used to efficiently create F0  
81 animals in which both alleles of the gene of interest are mutated and are functionally inactivated  
82 (i.e., gene KOs) (Fig. 1B). Although each F0 animal may have different mutations, they would all  
83 be functionally and phenotypically equivalent if a critical part of the gene were sufficiently mutated.

84 Our long-term goal is to employ this accelerated technique to vastly speed up the  
85 screening process of testing novel ethanol-responsive genes for involvement in ethanol-related  
86 behavioral phenotypes, including ethanol consumption. Therefore, we initially piloted this  
87 approach *in vitro* on two novel ethanol-responsive long noncoding RNA (lncRNA) genes. We  
88 subsequently sought to validate this method *in vivo* by mutating a gene previously shown to alter  
89 behavioral responses to ethanol when inactivated using traditional global KO technology. *MyD88*  
90 was chosen as a well-characterized ethanol-responsive gene for proof-of-concept as prior studies  
91 have evaluated the effects of *MyD88* global KO on ethanol-related behaviors, including ethanol  
92 drinking<sup>5</sup> and response to ethanol's acute sedative/hypnotic and motor ataxic effects<sup>6,7</sup>. Single

93 generation F0 MyD88 KO animals were hypothesized to exhibit decreased ethanol-induced  
94 sedative/hypnotic effects, decreased sensitivity to ethanol-induced motor ataxia, and a male-  
95 specific increase in ethanol consumption relative to controls.

96 To further streamline this accelerated KO mouse protocol, we reasoned that for first pass  
97 screening of genes for behavioral phenotypes, isogenic animals purchased directly from a vendor  
98 could be used as a control group for comparison to KOs. However, one concern is that the  
99 CRISPR procedure itself, irrespective of the gene being mutated, could exert deleterious effects  
100 that could lead to false positive or negative results. Therefore, we also created in-house Mock  
101 treatment controls that were produced under an identical protocol to the KOs except that the  
102 Mock-treated animals were created with procedures that lacked crRNAs. This Mock-treated  
103 control group was directly compared to isogenic C57BL/6J WT mice (Jax controls) purchased  
104 from the Jackson Laboratory (JAX). We hypothesized that these two control groups would not  
105 differ on behavioral endpoints of interest.

106 In this report, we describe implementation and validation of a novel technique for the  
107 accelerated production of CRISPR KO mice in one generation. Animals produced via this protocol  
108 are herein affectionately referred to as CRISPR Turbo Accelerated KnockOuts (i.e., CRISPy  
109 TAKOs). We report that our CRISPR protocol can reliably produce a large number of F0 KO  
110 animals and that the ethanol phenotype of MyD88 CRISPy TAKOs largely recapitulates results  
111 previously reported for traditional MyD88 global KOs. Furthermore, for the behaviors tested in this  
112 study, vendor purchased mice and Mock treatment controls did not differ substantially. Together,  
113 these results establish the CRISPy TAKO method for screening gene function *in vivo*. This  
114 method has moderately high throughput and will be especially useful for phenotypes, such as  
115 behavioral responses, that cannot be assayed *in vitro*.

## Materials and Methods:

### 116 Animals:

117 All experiments were approved by the Institutional Animal Care and Use Committee of the  
118 University of Pittsburgh and conducted in accordance with the National Institutes of Health  
119 Guidelines for the Care and Use of Laboratory Animals. C57BL/6J male and female mice used to  
120 generate embryos for electroporation and the purchased control group were procured from The  
121 Jackson Laboratory (Bar Harbor, ME). CD-1 recipient females and vasectomized males were  
122 procured from Charles River Laboratories, Inc. (Wilmington, MA). Mice were housed under 12-  
123 hr light/dark cycles, with lights on at 7 AM and had *ad libitum* access to food (irradiated 5P76  
124 ProLab IsoProRMH3000; LabDiet, St. Louis, MO) and water.

### 125 gRNA Design:

126 Guide RNAs (gRNAs) were generated using a commercially available two-piece system  
127 termed ALT-R™ CRISPR/Cas9 Genome Editing System (IDT DNA, Coralville, IA). This system  
128 combines a custom CRISPR RNA (crRNA) for genomic specificity with an invariant trans-  
129 activating crRNA (tracrRNA) to produce gRNAs<sup>4</sup>. crRNAs were designed using the computational  
130 program CCTop/CRISPRator<sup>8,9</sup>, which gauges candidate sgRNAs for efficiency and specificity.

131 Four crRNAs were used to target the ethanol-responsive lncRNA gene *4930425L21Rik*  
132 (see Table 1 for gRNA target sequences). These four crRNAs bind within a 366bp region that  
133 includes the putative promoter and first Exon (see Fig. 2A). Similarly, four crRNAs were used to  
134 target the lncRNA gene *Gm41261* (see Table 1 for gRNA target sequences). These four crRNAs  
135 bind with a 316bp region that includes the putative promoter and first Exon (see Fig. 2C). Four  
136 crRNAs were also selected for *MyD88* (see Table 1 for gRNA target sequences) that bind within  
137 a 209bp region that includes *MyD88* Exon 3 and flanking DNA (see Fig. 3A). For each project,  
138 the four crRNAs were annealed separately with tracrRNA in a 1:2 molar ratio then combined into  
139 a single solution.

140 CRISPR/Cas9 Mutagenesis:

141 Female C57BL/6J mice were superovulated with 0.1mL of CARD HyperOva (CosmoBio,  
142 #KYD-010) between 10 AM and 11 AM, followed by 100 IU of human chorionic gonadotropin  
143 (Sigma, #CG10) 46-48hrs later. Donor females were caged overnight with C57BL/6J males  
144 starting 4-6hrs post-gonadotropin injection and allowed to mate. Embryos were harvested from  
145 oviducts between 9 AM and 10 AM the following morning, cumulus cells were removed using  
146 hyaluronidase, and embryos were cultured under 5% CO<sub>2</sub> in KSOM medium (Cytospring, #K0101)  
147 for 1-2hrs. Embryos were electroporated in 5 $\mu$ L total volume of Opti-MEM medium  
148 (ThermoFisher, #31985088) containing 100ng/ $\mu$ L of each sgRNA and 100 or 200ng/ $\mu$ L Alt-R<sup>®</sup>  
149 S.p. Cas9 Nuclease V3 protein (IDT, #1081058) with a Bio-Rad Gene-Pulser Xcell in a 1mm-gap  
150 slide electrode (Protech International, #501P1-10) using square-wave pulses (five repeats of  
151 3msec 25V pulses with 100msec interpulse intervals). Two different concentrations of Cas9  
152 protein were used to assess which produced greater mutagenesis in embryos targeting genes  
153 *4930425L21Rik* and *Gm41261*; only the 200ng/ $\mu$ L concentration was used for MyD88 embryos.  
154 Electroporated embryos were placed back into culture under 5% CO<sub>2</sub> in KSOM. For  
155 *4930425L21Rik* and *Gm41261*, embryos were cultured for 3 days until the morulea/blastocyst  
156 stage and subsequently analyzed for mutations. For MyD88, one- or two-cell embryos were  
157 implanted into the oviducts of plug-positive CD-1 recipient (20-40 embryos per recipient) that had  
158 been mated to a vasectomized male the previous night. Mock-treated controls were manipulated  
159 in parallel as described above, except that the electroporation mix lacked the *MyD88*-specific  
160 crRNAs (i.e., only tracrRNA and Cas9 protein were used).

161 Genotyping:

162 For *4930425L21Rik* and *Gm41261*, DNA was amplified from individual embryos using a  
163 Qiagen Repli-G kit (Qiagen, #150025) and subject to PCR genotyping under the following

164 settings: 95°C for 5min (1x); 95°C for 30sec, 60°C for 30sec, 72°C for 1min (40x); 72°C for 10min  
165 (1x). Primers for PCR amplification of *4930425L21Rik* and *Gm41261* are listed in Table 1. PCR  
166 amplicons (WT = 613 and 506bp, respectively) were analyzed by agarose gel electrophoresis and  
167 Sanger sequencing.

168 For *MyD88*, DNA was isolated from tail snips of *MyD88* CRISPy TAKO and Mock-treated  
169 control offspring using Quick Extract (Lucigen, #QE09050). Primers for *MyD88* genotyping are  
170 listed in Table 1. PCR amplicons (WT = 494bp) were analyzed by agarose gel electrophoresis  
171 and Sanger sequencing.

#### 172 Subcloning:

173 Samples that did not produce clear chromatograms were subcloned to identify allelic  
174 variants. The TOPO™ TA cloning kit (ThermoFisher Scientific, #K457501) was used according  
175 to manufacturers instructions, with slight modifications. Briefly, sample PCR product was  
176 incubated at room temperature for 15mins with TOPO reagents, then the TOPO vector mixture  
177 was incubated with chemically competent DH5 $\alpha$  (ThermoFisher Scientific, #18265017) cells on  
178 ice for 30min. Cells were then heat-shocked for 45sec in a 42°C water bath then immediately  
179 placed back on ice for 2min. S.O.C. medium (ThermoFisher Scientific, #15544034) was added  
180 and cells were incubated in a bacterial shaker at 37°C for 90min at 225rpm. Cells were plated on  
181 kanamycin-resistant LB plates and incubated at 37°C for 16-18hrs. Single colonies (n = 10 per  
182 sample) were collected and their DNA was used for PCR. Colonies that produced a single PCR  
183 band were then Sanger sequenced.

#### 184 RNA Preparation:

185 Brain cerebellar tissue from one Mock treatment control (n = 1 male), one Jax control (n  
186 = 1 male), and 6 *MyD88* mutants (n = 3 male, n = 3 female) were used for RT-PCR analysis. All



187 mice were 11-12 weeks of age at time of sacrifice. Total RNA was isolated using TRIzol  
188 (Invitrogen, #15596018) according to the manufacturer's protocol, and purified with a TURBO  
189 DNA-free™ Kit (Invitrogen, #AM1907). Total RNA was analyzed for purity and concentration using  
190 a Nanodrop Spectrophotometer (Thermo Scientific, Waltham, MA). One microgram of purified  
191 RNA was converted into cDNA using Superscript™ III First-Strand Synthesis System (Invitrogen,  
192 #18080051) with random hexamer primers. PCR primers were used that span from Exon 2 to  
193 Exon 4 (see Supplementary Table 1) of MyD88. A reaction that lacked reverse transcriptase was  
194 used as a negative control for each sample tested. RT-PCR amplicon size is 280bp for WT, and  
195 99bp when Exon 3 is lacking.

#### 196 Behavioral Testing:

197 All mice were moved into a reverse light-cycle housing/testing room (lights off at 10 AM)  
198 at 5 weeks and allowed to acclimate for 2-3 weeks before the start of experiments. Experiments  
199 were performed in the housing room (ethanol drinking) or an adjoining room [loss of the righting  
200 response (LORR), rotarod]. Mice were group-housed 4 to 5 per cage based on genotype and  
201 sex. The same mice were sequentially tested on the rotarod, LORR, and drinking assays, with  
202 4-7 days between assays.

#### 203 Drugs:

204 Injectable ethanol solutions were prepared fresh daily in 0.9% saline (20%, v/v). Ethanol  
205 (Decon Laboratories, Inc.) was injected intraperitoneally (i.p.) at 0.02mL/g of body weight.

#### 206 Rotarod:

207 In order to assess ethanol-induced motor ataxia, mice were trained on a fixed speed  
208 rotarod (Ugo Basile, Gemonio, Province of Varese, Italy) at 11rpm. Training was considered  
209 complete when mice were able to remain on the rotarod for 60sec. Following training, mice were

210 injected with ethanol (2g/kg, i.p.) and every 15min mice were placed back on the rotarod and  
211 latency to fall was measured until mice were able to remain on the rotarod for 60sec.

#### 212 Loss of the Righting Response (LORR):

213         Sensitivity to the sedative/hypnotic effects of ethanol was determined using the LORR  
214 assay. Mice were injected with ethanol (3.5g/kg, i.p.) and when mice became ataxic, they were  
215 placed in the supine position in V-shaped plastic troughs until they were able to right themselves  
216 3 times within 30sec. LORR was defined as the time from being placed in the supine position until  
217 they regained their righting reflex. Body temperatures were maintained using a heat lamp  
218 throughout the assay.

#### 219 Two-Bottle-Choice Every-Other-Day (2BC-EOD) Drinking:

220         Mice were given access to ethanol (15%, v/v) and water for 24hr sessions every other day  
221 for 12 days starting at 12 PM. Water alone was offered on off days. Purchased drinking bottles  
222 were 15mL with 3.5-inch sipper tubes (Amuza, San Diego). The side placement of the ethanol  
223 bottles was switched with each drinking session to avoid side preference. Ethanol solutions were  
224 prepared fresh daily. Bottles were weighed before placement and after removal from the  
225 experimental cages. Empty cages with sipper bottles were used to control for leakage, and  
226 leakage amount was subtracted from amount consumed by the mice. The quantity of ethanol  
227 consumed, and total fluid intake, was calculated as g/kg body weight per 24hr. Preference was  
228 calculated as amount ethanol consumed divided by total fluid consumed per 24hr.

#### 229 Statistical Analysis:

230         Statistical analysis was performed with GraphPad Prism (GraphPad Software, Inc., La  
231 Jolla, CA) for two-tailed Mann-Whitney test and two-way ANOVA (with mixed-effects analysis (i.e.  
232 when technical failures are present), multiple comparisons, and repeated measures when

233 appropriate). Significant main effects were subsequently analyzed with Benjamini, Krieger, and  
234 Yekutieli two-stage linear step up procedure post-hoc analysis<sup>10</sup>. Technical failures were  
235 appropriately removed from analysis.

236 The two control groups were first compared to one another; if no difference was found  
237 between control groups, these groups were pooled and tested against the MyD88 KO group.  
238 Graphs show control groups plotted separately even though they were analyzed together, unless  
239 noted otherwise. Because of well-known sex differences on the behaviors of interest, and  
240 because male and female mice were tested on separate days, each sex was analyzed separately.  
241 Statistical significance was defined as  $p \leq 0.05$  and  $q \leq 0.05$ . All data are presented as mean  $\pm$   
242 S.E.M.

## 243 **Results:**

### 244 CRISPR/Cas9-mediated Mutagenesis:

245 Preliminary testing of the CRISPy TAKO method occurred *in vitro* using embryos  
246 electroporated at the one-cell stage, cultured until the blastocyst stage, then genotyped (Fig. 2).  
247 To enhance CRISPR mutagenesis frequency, each gene was targeted simultaneously with four  
248 gRNAs that were tiled across a small section of the gene. In addition, we tested two  
249 concentrations of Cas9 protein (100 and 200ng/ $\mu$ L) that were higher than the minimum amount  
250 we typically use (i.e., 50ng/ $\mu$ L).

251 The first gene targeted was an unannotated ethanol-responsive gene, *4930425L21Rik*,  
252 using 4 gRNAs that span ~400bp of the putative promoter and first Exon (Fig. 2A). Agarose gel  
253 electrophoresis of PCR amplicons that span the targeted locus indicated that 3 of 5 embryos  
254 tested at 100ng/ $\mu$ L Cas9 had obvious indels whereas 2 embryos (#'s 1.2 and 1.3; Fig. 2A, B) had  
255 amplicons that were grossly indistinguishable from the 613bp WT control amplicon (Fig. 2B).  
256 Sanger sequencing revealed #1.2 as heterozygous for WT and a 21bp deletion (Fig. 2A). At  
257 200ng/ $\mu$ L Cas9 protein, all seven embryos assessed were found to harbor deletions of varying

258 sizes (Fig. 2A, B). Thus, 0% of the embryos electroporated with 200ng/ $\mu$ L Cas9 harbored WT  
259 amplicons that were visible on the agarose gel or detectable by amplicon bulk sequencing.

260 The second gene targeted was another unannotated ethanol-responsive gene, *Gm41261*.  
261 Four gRNAs spanning ~350bp within the putative first exon were used (Fig. 2C). Agarose gel  
262 electrophoresis of PCR amplicons that span the targeted locus indicated that 1 of 5 embryos  
263 tested at 100ng/ $\mu$ L Cas9 had an obvious indel (#5.6; Fig. 2C, D), whereas the other 4 of 5 embryos  
264 had amplicons that were indistinguishable from the 506bp WT control amplicon (Fig. 2D). Sanger  
265 sequencing revealed one embryo (#5.3; Fig. 2C, D) was homozygous WT, whereas the other four  
266 embryos harbored various small deletions (Fig. 2C). At 200ng/ $\mu$ L Cas9, all six embryos assessed  
267 were found to harbor deletions of varying sizes (Fig. 2C, D). Although one embryo (#7.5) had a  
268 PCR product approximately the size of the WT amplicon (506bp), Sanger sequencing revealed a  
269 14bp deletion. Sanger sequencing also revealed a sequence inversion in #8.1, along with a 16bp  
270 insertion directly following the inverted sequence (Fig. 2C). Thus, 5 of 6 embryos electroporated  
271 at 200ng/ $\mu$ L Cas9 protein did not harbor detectable WT amplicons by agarose gel or amplicon  
272 bulk sequencing. Because the higher 200ng/ $\mu$ L Cas9 concentration showed greater mutagenic  
273 activity in both *4930425L21Rik* and *Gm41261*, this concentration was utilized in targeting *MyD88*.

274 As proof-of-concept and to validate our method *in vivo*, we created *MyD88* CRISPy TAKO  
275 mice. The four gRNAs were tiled across a 209bp region of *MyD88* that included Exon 3 (Fig. 3A).  
276 Exon 3 was targeted because prior traditional global *MyD88* KO studies demonstrated that  
277 deletion of this Exon inactivates *MyD88*<sup>11</sup> and imparts an alcohol behavioral phenotype<sup>5-7</sup>.

278 Implantation of embryos electroporated with *MyD88* gRNAs yielded 54 offspring (n = 26  
279 females, n = 28 males). Thirty-one offspring (n = 16 females, n = 15 males) were derived from  
280 electroporation of Mock-treated control embryos that were handled identically except that the  
281 crRNAs were omitted from the electroporation solution. All mice born from electroporated  
282 embryos were genotyped for gross indels at *MyD88* Exon 3 using endpoint PCR. The 494bp WT  
283 PCR amplicon was invariant and readily detectable in Jax and Mock-treated control samples as

284 expected (Fig. 3B and data not shown). In stark contrast, 52 of 54 MyD88 KO mice displayed  
285 gross indels that were readily apparent following gel electrophoresis of PCR products. PCR  
286 results are shown in Figure 3B for the subset (n = 15/sex) of the MyD88 mutant mice created that  
287 were selected for behavioral phenotyping. The indels varied from animal to animal and were  
288 approximately 50-300bp smaller than the 494bp WT amplicon. To accurately characterize the  
289 mutations present, we sequenced the PCR products of the mutated mice selected for behavior  
290 As illustrated in Figure 3A, deletions removed Exon 3, deleted splice junctions, and/or are  
291 predicted to create frameshifts.

292 Cerebellar tissue from a random subset of MyD88 CRISPy TAKOs and controls were used  
293 for RT-PCR analysis using PCR primers that bind to Exons 2 and 4 to examine MyD88 mRNA.  
294 This analysis revealed the expected 280bp fragment in Jax and Mock WT control samples (Fig.  
295 3C). In contrast, none of the six MyD88 CRISPy TAKO mice examined produced a fragment of  
296 this size. Five of the six samples produced a predominant band of ~99bp that would be expected  
297 for MyD88 mRNA that lacked Exon 3. One sample produced a major band of ~210bp and may  
298 represent a splicing defect. Thus, MyD88 CRISPy TAKO mice are likely to be functional KOs.

#### 299 Ethanol-Induced Loss of Righting Response (LORR):

300 No difference in ethanol LORR (3.5g/kg, i.p.) was found between the Mock and Jax control  
301 groups for males or females ( $p = 0.9671$  and  $p = 0.7345$ , respectfully; Fig. 4). Therefore, Mock  
302 controls and Jax controls were combined and compared to MyD88 KOs (for completeness, control  
303 results are plotted separately). Male MyD88 KOs exhibited a significant reduction in ethanol-  
304 induced LORR duration when compared to controls ( $p = 0.0068$ ; Fig. 4A). No difference was  
305 observed in females for ethanol-induced LORR (Fig. 4B).

306 Ethanol-Induced Motor Incoordination:

307 The ataxic effects of an acute ethanol injection (2g/kg, i.p.) were measured using a  
308 constant speed (11rpm) rotarod test. For male mice, comparison of Mock and Jax controls  
309 showed a significant effect of time [F (2.281, 41.05) = 36.41,  $p < 0.0001$ ], and time x genotype [F  
310 (9, 162) = 3.209,  $p = 0.0013$ ], but no effect of genotype (Fig. 5A). Because of the time x genotype  
311 interaction, control groups were not combined for this analysis. Repeated measures two-way  
312 ANOVA of all three groups revealed a significant effect of time [F (2.474, 71.73) = 59.01,  $p <$   
313  $0.0001$ ], and an effect of time x genotype [F (18, 261) = 1.964,  $p = 0.0120$ ] but no effect of  
314 genotype (Fig. 5A). Posthoc comparisons revealed that male Mock control mice recovered more  
315 quickly than Jax controls at the 15min timepoint ( $q = 0.0042$ ).

316 For females, comparison of Mock and Jax controls revealed a significant effect of time [F  
317 (2.775, 55.51) = 89.05,  $p < 0.0001$ ], but no effect of genotype or time x genotype (Fig. 5B).  
318 Therefore, the two control groups were combined (data plotted separately for completeness) and  
319 compared to Myd88 KOs. There was a significant effect of time [F (2.664, 87.90) = 148.3,  $p <$   
320  $0.0001$ ], and genotype [F (1, 33) = 4.721,  $p = 0.0371$ ], but no effect of the time x genotype  
321 interaction (Fig. 5B). Post-hoc analysis did not reveal any significant differences.

322 Two-Bottle Choice Every-Other-Day (2BC-EOD) Drinking:

323 Mice were tested for ethanol drinking using an intermittent every-other-day, two bottle free choice  
324 consumption assay over a period of 12 days. Mock and Jax control groups were first compared  
325 against each other; two-way ANOVA mixed-effects analysis was used for all 2BC-EOD statistical  
326 analyses. For males, there was a significant effect of time for ethanol intake [F (3.333, 62.00) =  
327 5.740,  $p = 0.0011$ ], ethanol preference (2.702, 50.27) = 10.85,  $p < 0.0001$ ], and total fluid intake  
328 [F (3.392, 63.09) = 17.98,  $p < 0.0001$ ], but there was no effect of genotype or time x genotype  
329 interaction for any of these parameters (Fig. 6A-C). Therefore, both Mock and Jax control groups  
330 were combined (data plotted separately for completeness) and compared to MyD88 KOs.

331 Analysis of ethanol intake in males between the combined control group and MyD88 KO revealed  
332 a main effect of time [ $F(4.123, 129.5) = 10.67, p < 0.0001$ ] and genotype [ $F(1, 32) = 4.850; p =$   
333  $0.0350$ ], but no interaction between the two (Fig. 6A). Post-hoc analysis revealed that MyD88 KO  
334 males had significantly greater intake on day 10 ( $q = 0.0285$ ) compared to controls. For  
335 preference in males, there was an effect of time [ $F(3.365, 105.7) = 24.02, p < 0.0001$ ] but no  
336 effect of genotype or time x genotype (Fig. 6B). For total fluid intake in males, there was a main  
337 effect of time [ $F(3.915, 122.9) = 36.79, p < 0.0001$ ] and genotype [ $F(1, 32) = 8.897, p = 0.0054$ ],  
338 but no time x genotype interaction between MyD88 KO and controls (Fig. 6C). Post-hoc analysis  
339 revealed significantly increased total fluid consumption in MyD88 KOs vs controls on days 4, 6, 8  
340 ( $q = 0.0118$ ), and day 10 ( $q = 0.0002$ ) (Fig. 6C).

341 In females, Mock and Jax control groups were first compared. There was a significant  
342 effect of time on ethanol intake [ $F(2.412, 47.27) = 8.979, p = 0.0002$ ] and ethanol preference [ $F$   
343  $(2.626, 51.47) = 22.58, p < 0.0001$ ], but no effect of genotype or time x genotype interaction on  
344 either parameter (Fig. 6D, E). Therefore, both control groups were combined (data plotted  
345 separately for completeness) and compared to MyD88 KOs. For ethanol intake, females showed  
346 a main effect of time [ $F(2.632, 86.85) = 12.50, p < 0.0001$ ] but not genotype or time x genotype  
347 interaction (Fig. 6D). Similarly, for ethanol preference a significant effect of time [ $F(3.317, 109.5)$   
348  $= 29.10, p < 0.0001$ ] but not genotype and time x genotype interaction was observed (Fig. 6E).  
349 Thus, ethanol intake and preference did not differ between female MyD88 KOs and the combined  
350 control group.

351 Comparing total fluid intake in female Mock and Jax controls revealed significant main  
352 effects of time [ $F(2.818, 55.22) = 9.800, p < 0.0001$ ] and genotype [ $F(1, 20) = 10.41, p = 0.0042$ ],  
353 but no time x genotype interaction (Fig. 6F). Therefore, for female total fluid intake, control groups  
354 were not combined and each genotype was considered separately. This analysis revealed a  
355 significant effect of time [ $F(2.650, 84.79) = 11.20, p < 0.0001$ ] and genotype [ $F(2, 33) = 4.221, p$

356 = 0.0223] (Fig. 6F), but no time x genotype interaction. Post-hoc analysis did not reveal any  
357 significant differences.

## 358 **Discussion:**

359         The current study reports on a CRISPR/Cas9-mediated mutagenesis protocol that is  
360 suitable for rapid screening for the phenotypic effects of gene KO *in vivo*. Traditional CRISPR  
361 mouse KO procedures require three generations of animal breeding and genotyping, which is  
362 time consuming and expensive. In contrast, with the CRISPy TAKO protocol described here, first  
363 generation gene-targeted F0 mice can be rapidly produced and screened for phenotypic effects.  
364 Although individual F0 mice harbor a variety of mutant alleles for the gene of interest, careful  
365 project design ensures that each F0 animal is functionally equivalent, i.e., a gene KO. F0 animals  
366 can be directly screened for phenotypes of interest. If no phenotype is detected, the gene is  
367 rapidly eliminated from further consideration. If an interesting phenotype is observed, a F0 animal  
368 can be bred as in traditional approaches to establish a true breeding line that can first be tested  
369 to confirm the phenotype. This will ensure rigor and reproducibility in the experimental pipeline.  
370 Subsequently, the line can be maintained long-term and more detailed, rigorous mechanistic  
371 studies can be conducted. The CRISPy TAKO approach can save valuable time and minimize  
372 animal numbers and financial resources.

373         There are several keys to the success of this approach. First, we use embryo  
374 electroporation to facilitate genetic modification of a large number of animals with minimal effort.  
375 Large numbers of embryos (n = 30-50) can be simultaneously transfected with CRISPR reagents  
376 at a very high efficiency<sup>12-16</sup>. This avoids the limiting bottleneck of directly injecting each individual  
377 embryo. Second, achieving a very high level of indel formation that ablates function of the gene  
378 of interest in each animal is critical. We observed that 52 of 54 of animals harbored inactivating  
379 indels, while the other two harbored small mutations that were not characterized. To achieve this  
380 high KO efficiency, we simultaneously utilized four gRNAs that targeted a small, functionally



381 important portion of the gene of interest. In other experiments, we have observed that the  
382 mutagenesis efficiency of a single gRNA is highly variable. Simultaneous use of two gRNAs tends  
383 to increase mutagenesis efficiency. We reasoned that an even higher number of gRNAs tiled  
384 across a small but functionally important part of a gene would result in even higher efficiency. We  
385 are unsure if four is the optimal number of gRNAs, but this should be rigorously explored in future  
386 studies. For *in vivo* proof-of-concept, we focused on a small, single Exon of the *MyD88* gene that  
387 results in a null allele when disrupted<sup>5-7,11</sup>. This approach should also work by targeting the  
388 promoter or any region that is critical for function of the gene and/or gene product. It should also  
389 be noted that we observed that 200ng/μL Cas9 protein in the electroporation mix produced a  
390 much higher rate of indel formation compared to 100ng/μL. While 200 ng/μL is 4x the minimum  
391 amount we typically use in our lab for most CRISPR embryo electroporation experiments, this  
392 amount is less than that reported in the literature<sup>15,16</sup>.

393 The CRISPy TAKO approach could be further streamlined and throughput increased if  
394 control animals for comparison could be procured directly from a vendor. However, it is  
395 conceivable that the *in vitro* embryo manipulation / CRISPR electroporation procedure could  
396 introduce some unknown variable that could impact the phenotype of interest regardless of the  
397 gene targeted for modification. Therefore, we compared phenotypes of control animals procured  
398 directly from JAX with isogenic controls that were produced in-house, in parallel to the *MyD88*  
399 TAKOs. This in-house control group was created using procedures that were identical to those  
400 used to create *MyD88* TAKOs except that crRNAs were omitted from the electroporation  
401 reactions. We observed near complete concordance between these Mock controls and Jax  
402 control animals for the behavioral phenotypes of interest. We only observed a subtle female-  
403 specific difference in total fluid consumption in the 2BC-EOD assay (Fig. 6G) and a male-specific  
404 genotype x time interaction on the rotarod (Fig 5A). We conclude that mice purchased directly  
405 from a vendor can be used as a control group for screening CRISPy TAKO mice for behavioral  
406 alterations provided the controls are the same genetic background as those animals that served

407 as embryo donors. Using a single vendor-derived control group will substantially increase  
408 throughput and reduce expenses.

409 As proof-of-concept of the CRISPy TAKO approach, we focused on *MyD88* as a candidate  
410 gene. We sought to functionally validate our approach by comparing behavioral phenotypes  
411 observed with those previously reported for global *MyD88* KO mice produced using traditional  
412 gene targeting technology, which displayed robust alterations in ethanol-induced behavioral  
413 responses and ethanol drinking behavior<sup>5-7</sup>. Overall, similar behavioral results were observed  
414 between traditional *MyD88* KOs and *MyD88* CRISPy TAKOs (Table 1). Consistent with previous  
415 findings, the *MyD88* KO females show faster recovery time from ethanol's incoordination effects  
416 (Fig. 5B), but contrary to those studies, no difference between male *MyD88* KOs and controls is  
417 reported here (Fig. 5A). Also consistent with previous reports, albeit with a milder effect size<sup>5</sup>,  
418 *MyD88* KO males had greater consumption of ethanol than controls (Fig. 6A). However, KO males  
419 in the present study did not have a difference in preference when compared to controls (Fig. 6B),  
420 but had significantly increased total fluid intake compared to controls (Fig. 6C), suggesting these  
421 male mice drink more fluid in general, and it is not specific to ethanol. Altered total fluid intake in  
422 *MyD88* KO females compared to controls (Fig. 6F) is consistent with the published literature<sup>5</sup>.

423 It is unclear if the results presented here show a milder phenotype than those previously  
424 reported<sup>6,7</sup>, or if these differences are simply due to experimental variation that is common in  
425 behavioral studies between labs, facilities, and universities<sup>17,18</sup>. Although all studies were  
426 conducted using C57BL/6J mice, the current study utilized mice sourced directly from JAX,  
427 whereas Blednov et al., 2017a/b used mice sourced from JAX that were bred in-house for an  
428 unspecified number of generations. It is also possible that the CRISPy TAKO approach is slightly  
429 less sensitive than the traditional KO approach for detecting phenotypic changes. The most likely  
430 explanation for such a possibility is that F0 CRISPR mice may be mosaic and it is conceivable  
431 that tail DNA genotyping is not reflective of the genetic changes that occur in the brain of the  
432 mutant animals. It is possible that some WT *MyD88* is expressed in the brain of some F0 animals,

433 however this is unlikely because RT-PCR analysis of a subset of TAKO MyD88 mice did not  
434 reveal WT bands (Fig. 3C). Nonetheless, the approach described here should be very useful for  
435 a first pass screening method to identify genes with a large effect on a phenotype of interest. The  
436 usefulness of this approach for detecting subtle genotypic differences requires further evaluation.

437         One limitation of the approach as outlined is the potential for off-target effects of CRISPR  
438 mutagenesis. This approach uses multiple gRNAs simultaneously along with a relatively high  
439 concentration of Cas9, both of which could lead to off-target effects. Although off-target effects  
440 were not examined in this study, they are unlikely to explain the phenotypic changes we observed.  
441 The main behavioral phenotypes observed in the MyD88 CRISPy TAKO mice are the same as  
442 those observed in MyD88 global KOs that were produced using traditional, non-CRISPR gene  
443 targeting techniques. Furthermore, several studies have reported that off-target effects in  
444 CRISPR/Cas9 animals is minimal with careful selection of gRNAs as done in the present study<sup>19-</sup>  
445 <sup>21</sup>.

446         In summary, we propose using the CRISPy TAKO approach for rapidly screening large  
447 numbers of genes *in vivo* to identify those that have large effects on a phenotype of interest. Once  
448 such a gene is identified, an individual animal that harbors a confirmed KO allele should be mated  
449 to establish a true breeding mutant KO line. A true breeding line will be useful for future studies  
450 to (a) confirm the phenotype of interest, (b) to test for and rule out the potential impact of off-target  
451 mutations, (c) to enable the rigorous testing of control and KO littermates derived from  
452 heterozygous matings, and (d) to provide an unlimited source of uniform animals for further, in-  
453 depth analyses and long term line maintenance.

454         We conclude that the CRISPy TAKO method can be used for efficient, moderate  
455 throughput, *in vivo* screens to identify genes that impact whole animal responses when ablated.  
456 This method avoids the extensive animal breeding, time, and resources required with traditional  
457 CRISPR animal KO approaches. This method should find widespread use in studies where

458 moderate to large numbers of genes must be rapidly screened for effects that cannot be  
459 interrogated *in vitro*, such as whole animal behavioral responses.

460 Conflict of Interest:

461 The authors declare that the research was conducted in the absence of any commercial or  
462 financial relationships that could be construed as a potential conflict of interest.

463 Author Contributions:

464 Project conception and gRNA design devised by GEH. *In vitro* analysis conducted by AS and GEH.  
465 *In vivo* project design, organization, and analysis conducted by SLP. SLP and AS managed the  
466 behavioral experimentation together. All authors contributed to writing and editing of the  
467 manuscript.

468 Funding:

469 This work was supported by the National Institutes of Health grants U01 AA020889 and T32  
470 GM08424

471 Acknowledgements:

472 The authors would like to acknowledge Carolyn Ferguson for expert technical support, Tanya  
473 Kenkre, PhD for statistical consultation, and members of the INIA-Neuroimmune consortium for  
474 helpful discussions and constant encouragement.

475    References:

- 476    1    Michels, B. E. *et al.* Pooled In Vitro and In Vivo CRISPR-Cas9 Screening Identifies  
477       Tumor Suppressors in Human Colon Organoids. *Cell Stem Cell* (2020).
- 478    2    Khan, D. H. *et al.* Mitochondrial carrier homolog 2 (MTCH2) is necessary for AML  
479       survival. *Blood Journal*, blood. 2019000106 (2020).
- 480    3    Muir, A. M. *et al.* Bi-allelic Loss-of-Function Variants in NUP188 Cause a Recognizable  
481       Syndrome Characterized by Neurologic, Ocular, and Cardiac Abnormalities. *The*  
482       *American Journal of Human Genetics* (2020).
- 483    4    Homanics, G. E. Gene-edited CRISPy Critters for alcohol research. *Alcohol* **74**, 11-19  
484       (2019).
- 485    5    Blednov, Y. A. *et al.* Ethanol Consumption in Mice Lacking CD14, TLR2, TLR4, or  
486       MyD88. *Alcohol Clin Exp Res* **41**, 516-530, doi:10.1111/acer.13316 (2017).
- 487    6    Blednov, Y. A. *et al.* Sedative and Motor Incoordination Effects of Ethanol in Mice  
488       Lacking CD14, TLR2, TLR4, or MyD88. *Alcohol Clin Exp Res* **41**, 531-540,  
489       doi:10.1111/acer.13314 (2017).
- 490    7    Wu, Y. *et al.* Inhibiting the TLR4-MyD88 signalling cascade by genetic or  
491       pharmacological strategies reduces acute alcohol-induced sedation and motor  
492       impairment in mice. *British journal of pharmacology* **165**, 1319-1329 (2012).
- 493    8    Stemmer, M., Thumberger, T., del Sol Keyer, M., Wittbrodt, J. & Mateo, J. L. CCTop: an  
494       intuitive, flexible and reliable CRISPR/Cas9 target prediction tool. *PloS one* **10** (2015).
- 495    9    Labuhn, M. *et al.* Refined sgRNA efficacy prediction improves large-and small-scale  
496       CRISPR–Cas9 applications. *Nucleic acids research* **46**, 1375-1385 (2018).
- 497    10    Benjamini, Y., Krieger, A. & Yekutieli, D. Adaptive linear step-up false discovery rate  
498       controlling procedures. *Biometrika* **93**, 491-507 (2006).
- 499    11    Hou, B., Reizis, B. & DeFranco, A. L. Toll-like receptor-mediated dendritic cell-  
500       dependent and-independent stimulation of innate and adaptive immunity. *Immunity* **29**,  
501       272 (2008).
- 502    12    Modzelewski, A. J. *et al.* Efficient mouse genome engineering by CRISPR-EZ  
503       technology. *Nat Protoc* **13**, 1253-1274, doi:10.1038/nprot.2018.012 (2018).
- 504    13    Chen, S., Lee, B., Lee, A. Y.-F., Modzelewski, A. J. & He, L. Highly efficient mouse  
505       genome editing by CRISPR ribonucleoprotein electroporation of zygotes. *Journal of*  
506       *Biological Chemistry* **291**, 14457-14467 (2016).
- 507    14    Hashimoto, M., Yamashita, Y. & Takemoto, T. Electroporation of Cas9 protein/sgRNA  
508       into early pronuclear zygotes generates non-mosaic mutants in the mouse.  
509       *Developmental biology* **418**, 1-9 (2016).
- 510    15    Wang, W. *et al.* Delivery of Cas9 protein into mouse zygotes through a series of  
511       electroporation dramatically increases the efficiency of model creation. *Journal of*  
512       *Genetics and Genomics* **43**, 319-327 (2016).
- 513    16    Wefers, B., Bashir, S., Rossius, J., Wurst, W. & Kühn, R. Gene editing in mouse zygotes  
514       using the CRISPR/Cas9 system. *Methods* **121**, 55-67 (2017).
- 515    17    Wahlsten, D., Bachmanov, A., Finn, D. A. & Crabbe, J. C. Stability of inbred mouse  
516       strain differences in behavior and brain size between laboratories and across decades.  
517       *Proceedings of the national academy of sciences* **103**, 16364-16369 (2006).
- 518    18    Crabbe, J. C., Wahlsten, D. & Dudek, B. C. Genetics of mouse behavior: interactions  
519       with laboratory environment. *Science* **284**, 1670-1672 (1999).
- 520    19    Willi, M., Smith, H. E., Wang, C., Liu, C. & Hennighausen, L. Mutation frequency is not  
521       increased in CRISPR–Cas9-edited mice. *Nature methods* **15**, 756-758 (2018).
- 522    20    Dong, Y. *et al.* Genome-wide off-target analysis in CRISPR-Cas9 modified mice and  
523       their offspring. *G3: Genes, Genomes, Genetics* **9**, 3645-3651 (2019).

- 524 21 Iyer, V. *et al.* No unexpected CRISPR-Cas9 off-target activity revealed by trio  
525 sequencing of gene-edited mice. *PLoS genetics* **14**, e1007503 (2018).
- 526 22 Wu, Y., Lousberg, EL., Moldenhauer, LM., Hayball, JD., Coller, JK., Rice, KC., Watkins,  
527 LR., Somogyi, AA., Hutchinson, MR. Inhibitibg the TLR4-MyD88 signalling cascade by  
528 genetic or pharmacological strategies reduces acute alcohol-induced sedation and motor  
529 impairment in mice. *British Journal of Pharmacology*, 11 (2012).

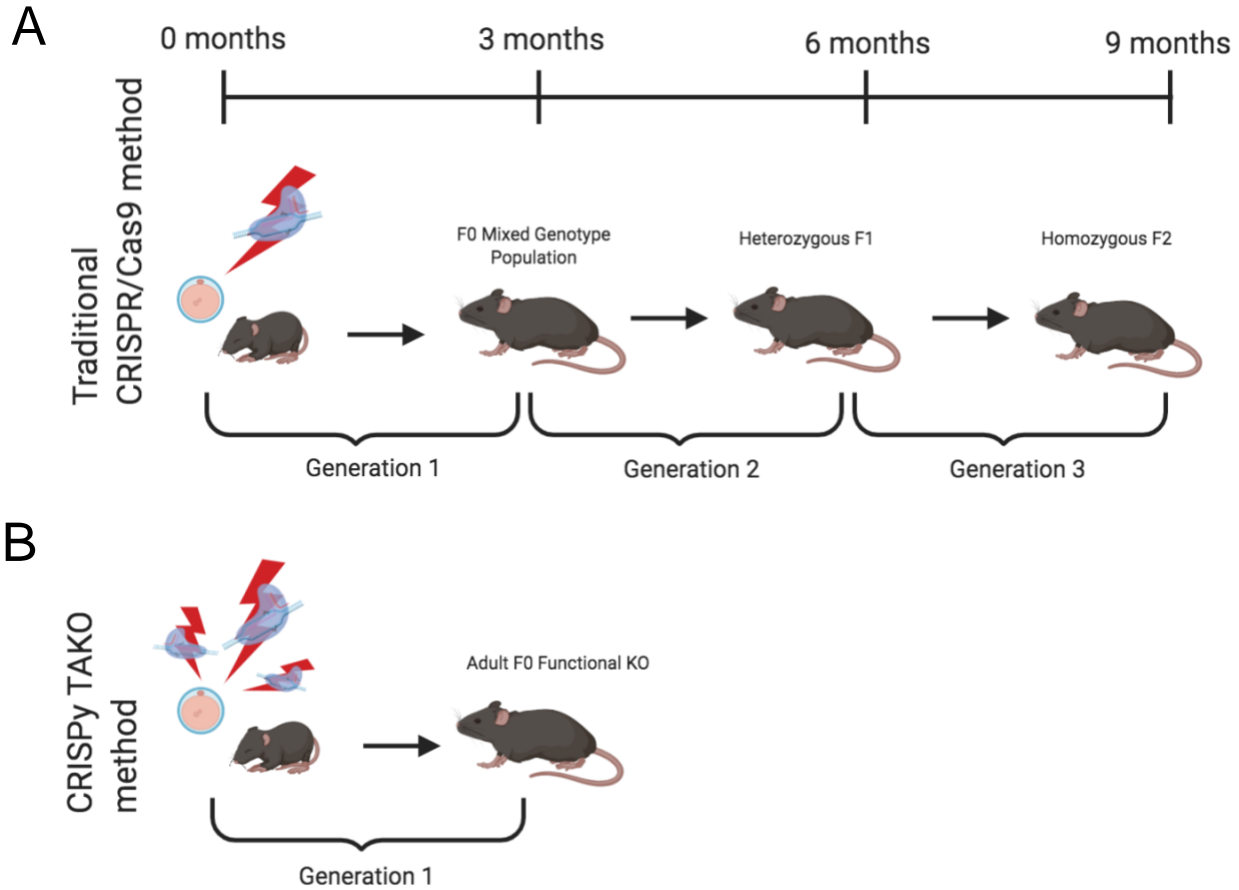

**Figure 1:** Comparison of the timeline required to produce knockout (KO) mice for behavioral testing using traditional and the CRISPy TAKO approaches. **(A)** Traditional CRISPR/Cas9-mediated method to create a stable KO line. Founder (F0) animals are an eclectic mix of wild-type, heterozygous, and homozygous KOs. A founder with an inactivating mutation is selected for breeding to establish a KO line of mice. First generation offspring (F1) are heterozygous and must be interbred to produce an F2 generation. A subset (~25%) of the F2 generation are homozygous KO mice and can be compared for behavioral phenotypes with WT littermates. **(B)** CRISPy TAKO method for creating functional KO mice. By using multiple gRNAs that target a small but functionally critical part of the gene of interest, most F0 mice harbor biallelic mutations that functionally inactivate the gene of interest and are suitable for behavioral phenotyping.

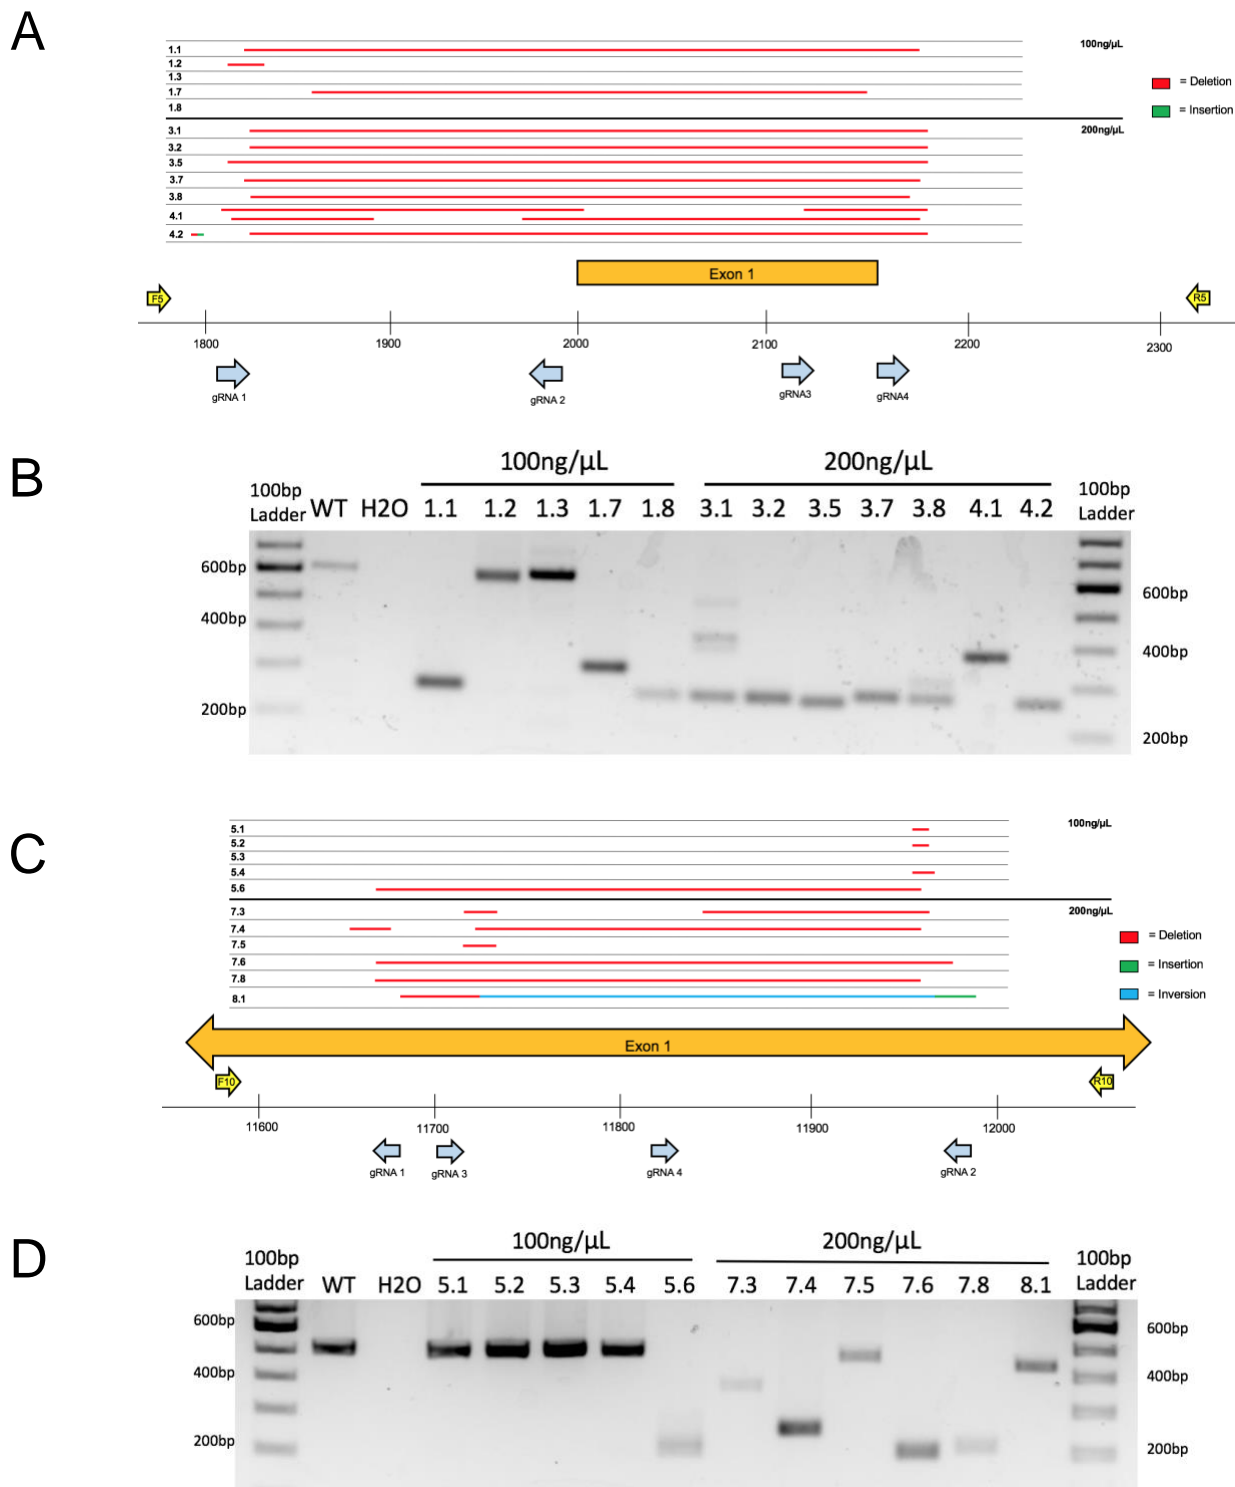

**Figure 2.** Embryo CRISPy TAKO genotypes for *4930425L21Rik* and *Gm41261*. (A) Sequence results for the major product(s) of TAKO embryos targeting gene *4930425L21Rik* electroporated with 100ng/ $\mu$ L and 200ng/ $\mu$ L Cas9 protein. Full deletions are shown in red. Sequence insertions are shown in green. Individual animal tag numbers are presented on the left. The gRNAs and PCR primers used are shown as blue and yellow arrows, respectively. (B) Agarose gel electrophoresis of PCR amplicons for *4930425L21Rik* in embryos. Samples 1.1 through 1.8 were electroporated with 100ng/ $\mu$ L Cas9 protein while samples 3.1 through 4.2 were electroporated with 200ng/ $\mu$ L Cas9 protein. (C) Sequence results from TAKO embryos targeting gene *Gm41261* with 100ng/ $\mu$ L and 200ng/ $\mu$ L Cas9. Sequence inversions are shown in blue. (D) Agarose gel electrophoresis of PCR amplicons for *Gm41261* in embryos. Samples 5.1 through 5.6 were embryos electroporated with 100ng/ $\mu$ L Cas9 while samples 7.3 through 8.1 were electroporated with 200ng/ $\mu$ L Cas9 protein.



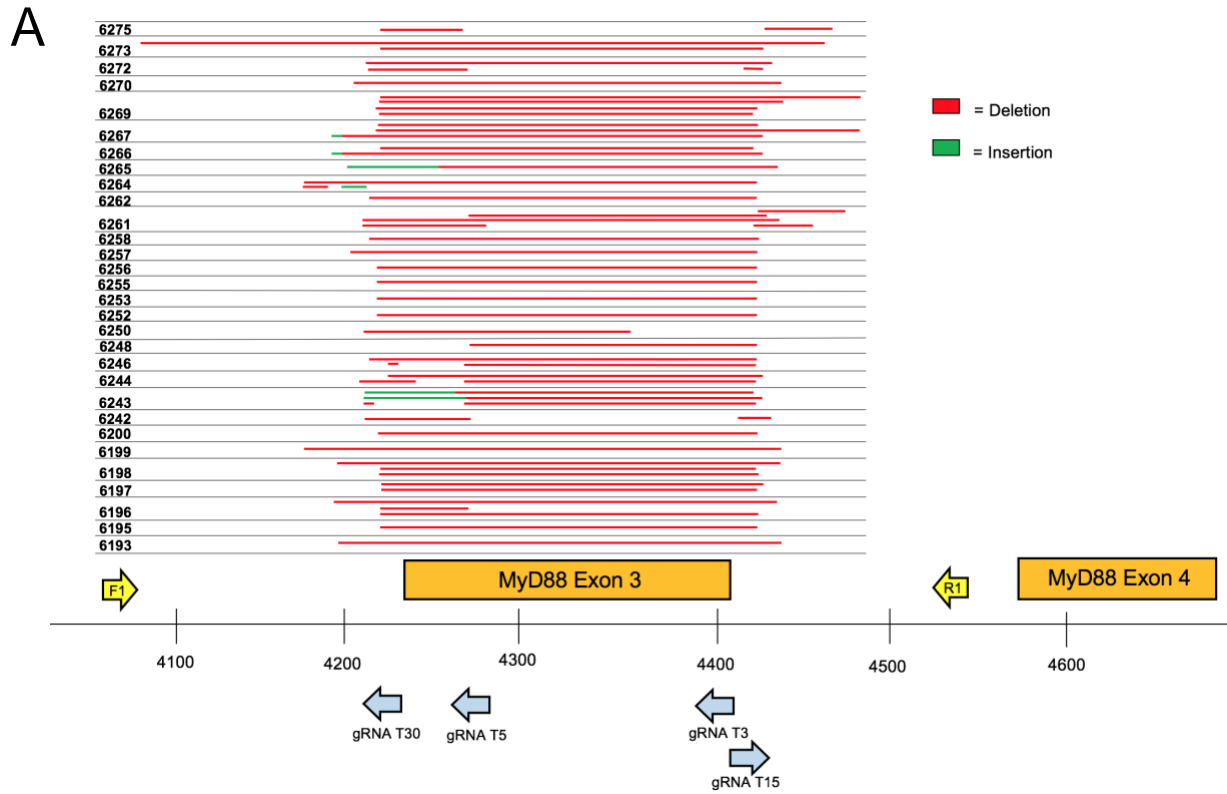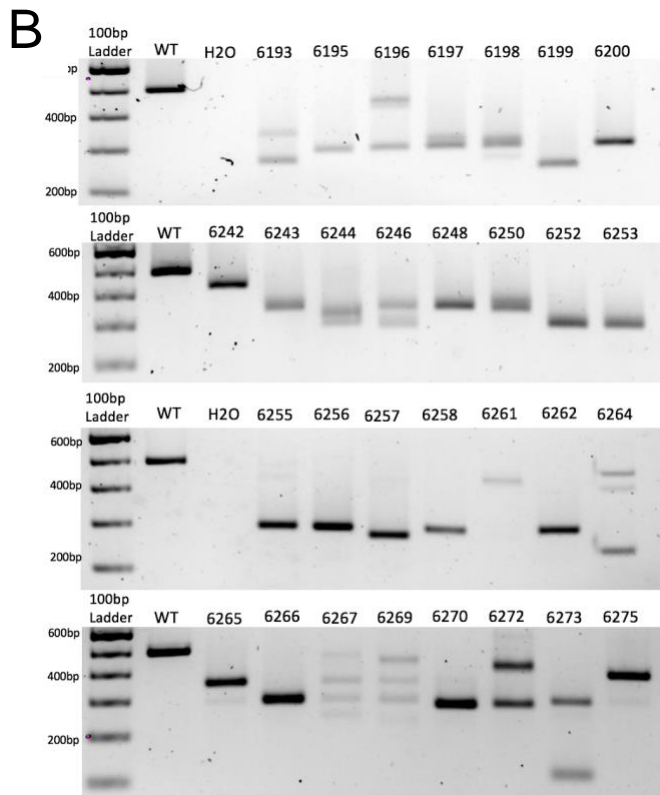

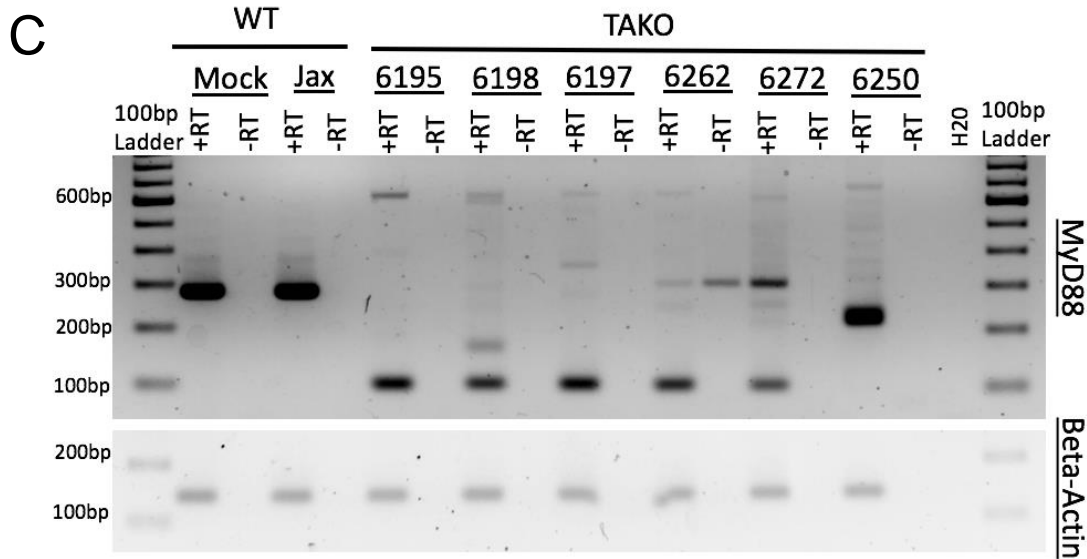

**Figure 3:** *In vivo* MyD88 CRISPy TAKO genotypes. (A) Sequencing results from mice selected for behavioral experimentation. CRISPR/Cas9 mutagenesis of MyD88 exon 3 was performed and animals used for experimentation were sequenced to confirm successful deletion. Full deletions are shown in red. Sequence insertions are shown in green. Individual animal tag numbers are presented on the left. The gRNAs and PCR primers used are shown as blue and yellow arrows, respectively. (B) PCR results from DNA of MyD88 CRISPy TAKO mice used for experimentation. Jax used as WT control. (C) RT-PCR results from cerebellar brain tissue from a random subset of Mock, Jax, and MyD88 CRISPy TAKO mice showing abnormal *MyD88* RNA transcripts in TAKO mice. RT-PCR using Beta-actin was used as a control.

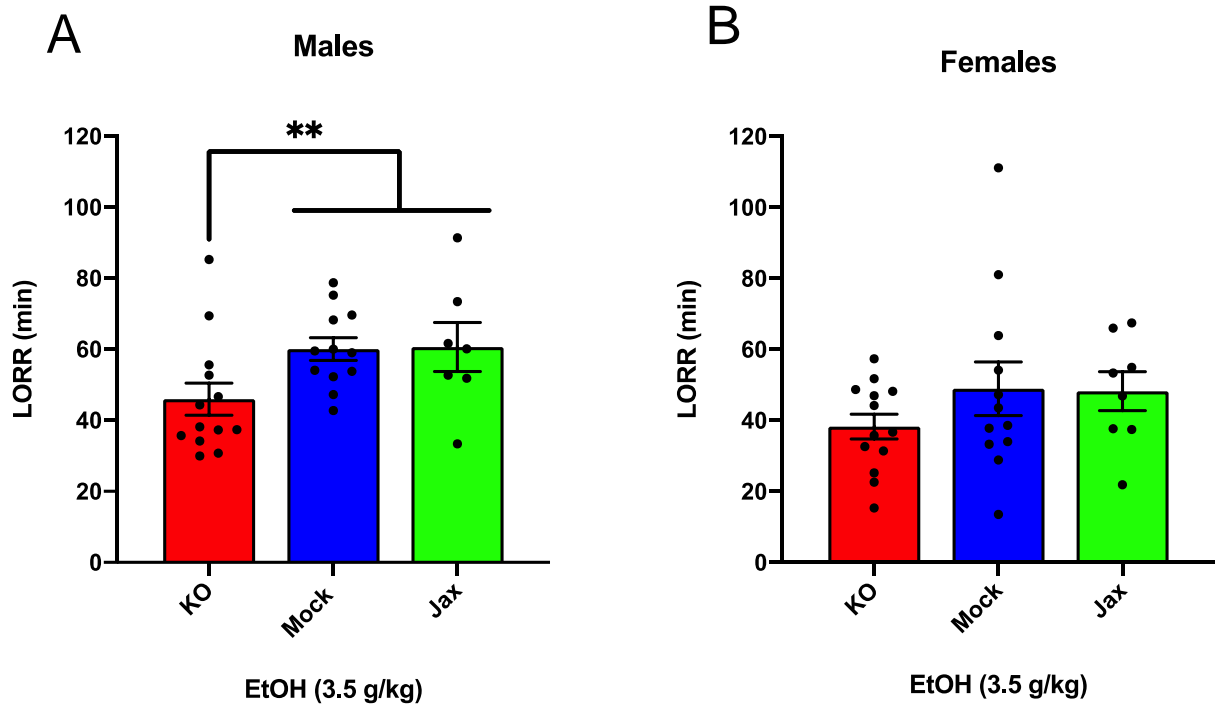

**Figure 4:** Duration of LORR induced by ethanol (3.5 g/kg, i.p.) injection in male (A) and female (B) MyD88 KOs, Mock controls and Jax controls. For both males and females, mock controls and Jax controls did not differ and therefore were pooled and compared to same sex MyD88 KOs (data are plotted separately for completeness). KO males had reduced duration of LORR compared to the combined control group (\*\* $p < 0.01$ ). For females, no difference was observed between MyD88 KOs and the combined control group. Values represent mean  $\pm$  SEM. Data were analyzed using a two-tailed Mann-Whitney test.

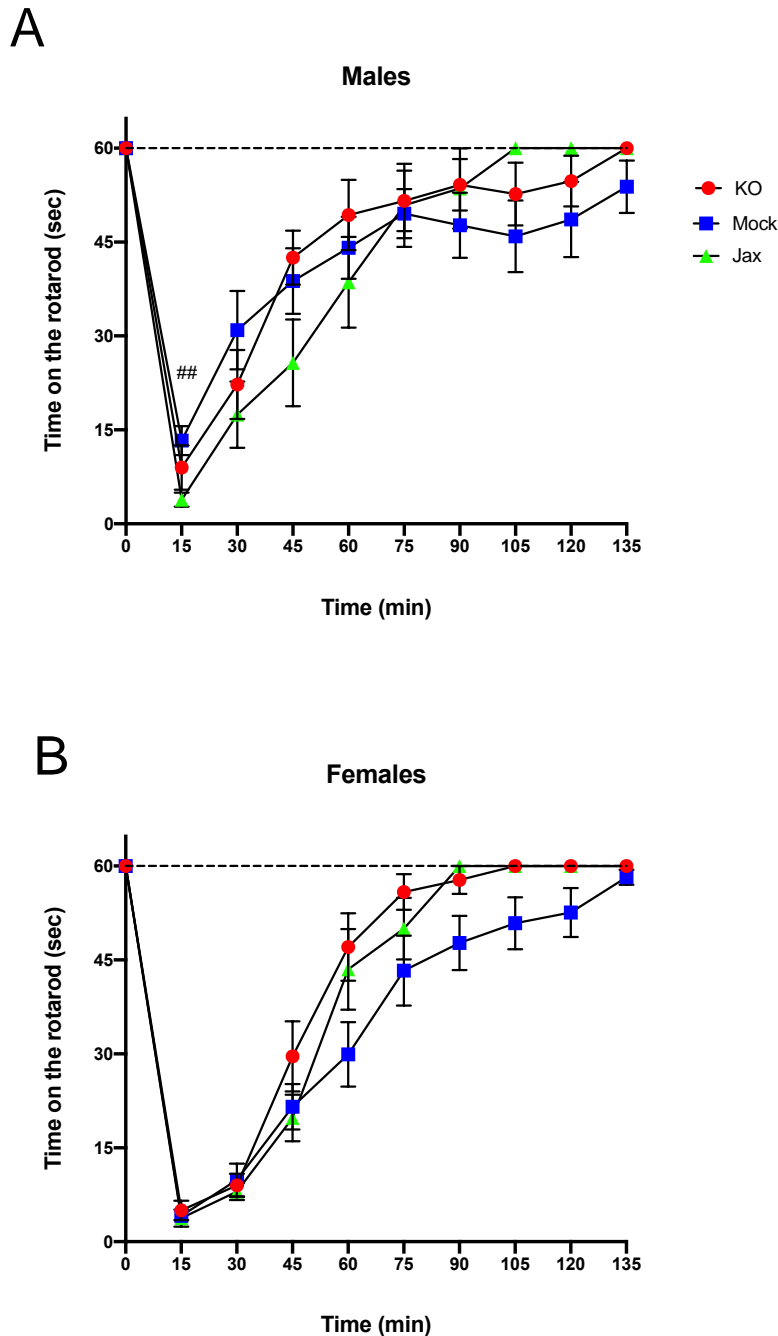

**Figure 5:** Recovery from ethanol (EtOH)-induced motor incoordination in MyD88 KO and control mice. **(A)** A significant time x genotype interaction was observed for male mock controls and Jax controls. Therefore, control groups were not combined. Jax controls recovered more slowly compared to Mock controls at the 30 min timepoint ( $##q < 0.01$ ). **(B)** Female mock controls and Jax controls did not differ and were combined for comparison to MyD88 KOs (data are plotted separately for completeness). Post-hoc analysis did not reveal any significant differences between groups at any time points. Data represent time in seconds on the rotarod after injection of EtOH (2 g/kg, i.p.). Values represent mean  $\pm$  SEM. Data were analyzed by repeated-measures 2-way ANOVA with multiple comparisons followed by Benjamini, Krieger, and Yekutieli post hoc-test.

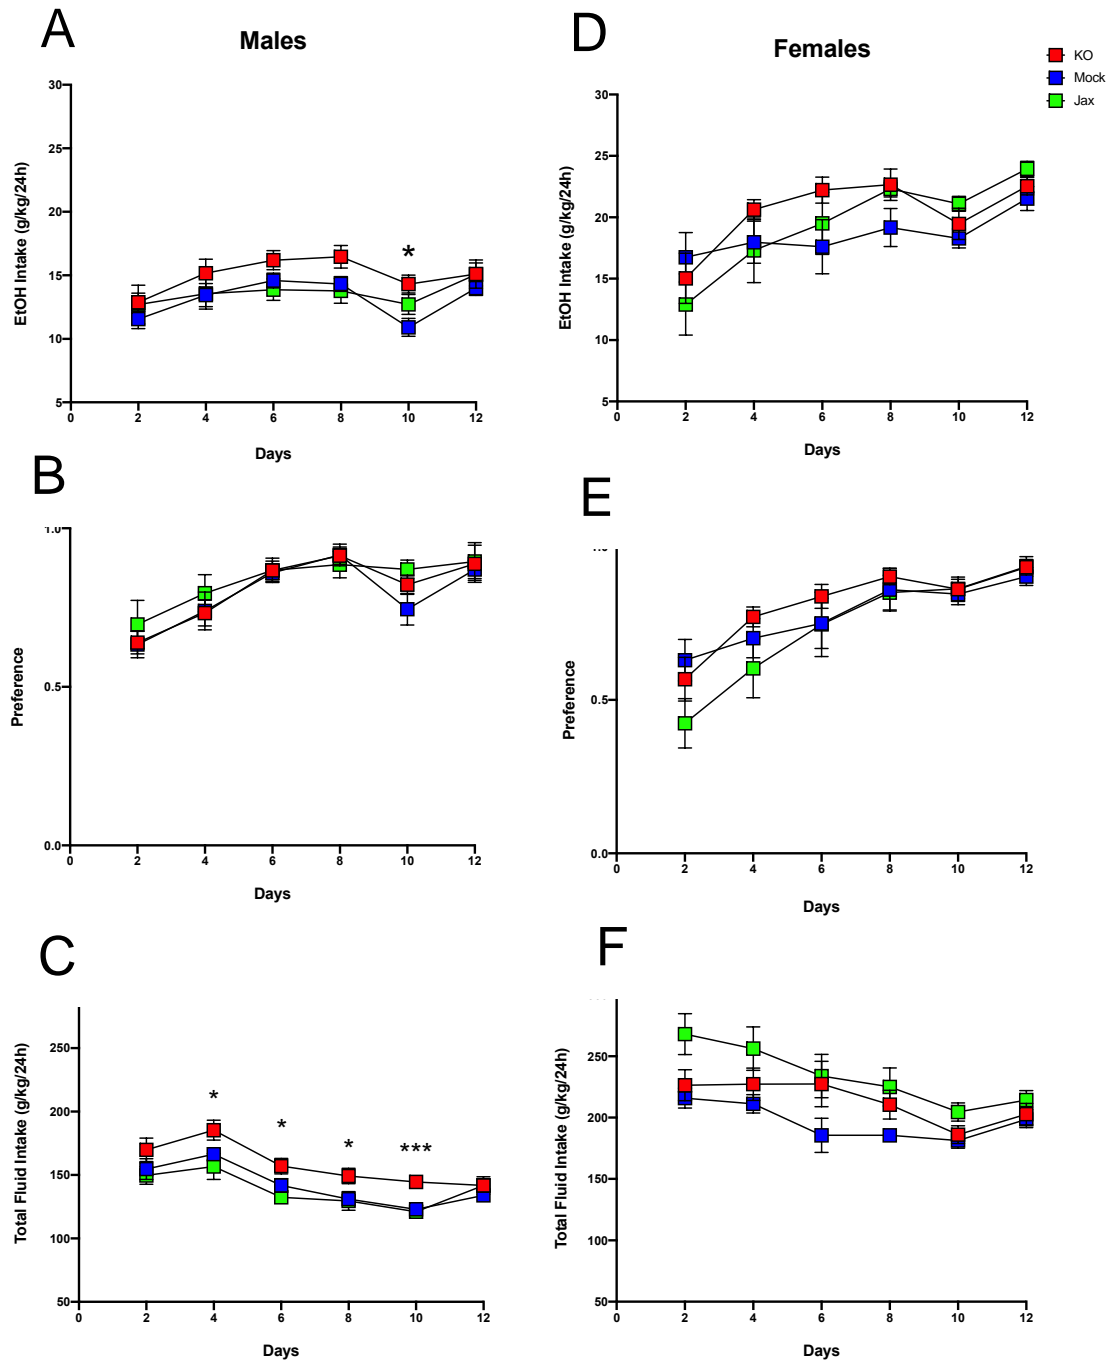

**Figure 6:** Two-bottle choice, every-other-day drinking in MyD88 KO, Mock control and Jax control mice. Left, males; right, females. **A and D.** Ethanol (EtOH) intake (g/kg/24 h), **B and E.** EtOH preference. **C and F.** Total fluid intake (g/kg/24 h) in control (Jax C57BL/6J, n = 8; Mock-treatment control, n = 13-14) versus mutant mice (n = 13-14 MyD88 KO). Values represent mean  $\pm$  SEM. Data were analyzed by repeated-measures 2-way ANOVA (mixed-effects analysis where appropriate) with multiple comparisons followed by Benjamini, Krieger, and Yekutieli post-hoc tests (\*p < 0.05 and \*\*\*p < 0.001 between MyD88 KO and combined controls).

|                              | CRISPy TAKO                |                            | Previous Reports                                                          |                               |
|------------------------------|----------------------------|----------------------------|---------------------------------------------------------------------------|-------------------------------|
|                              | Males                      | Females                    | Males                                                                     | Females                       |
| Rotarod                      | No change                  | Faster recovery            | Faster recovery <sup>6,22</sup>                                           | Faster recovery <sup>6</sup>  |
| EtOH Loss of Righting Reflex | Reduced duration           | No change                  | Reduced duration <sup>6,22</sup>                                          | Reduced duration <sup>6</sup> |
| 2BC-EOD (15% v/v)            | Increased ethanol drinking | Reduced total fluid intake | Increased ethanol drinking and preference.<br>Reduced total fluid intakes | Reduced total fluid intakes   |

Table 1: Comparison of TAKO cohort results with previous findings.
